# Supplementary material for: Identification of Novel Biomarkers in Peripheral Blood Mononuclear Cells of Hepatocellular Carcinoma Patients
Source: Preprints.org preprint supplement (doi:10.20944/preprints202304.0041.v1), 2023-04-04
Supplement: Supplementary file 1 [file supplementary]

Supplemental:

String Network: <https://string-db.org/cgi/network?taskId=bpjbFzu2Fhzy&sessionId=bnJPtYMOGLUn>

List of differentially expressed genes: <https://docs.google.com/spreadsheets/d/1OGw8gabFO7APmNZ9rgyZDgjAwMcqhBOqKQjFpydVW60/edit?usp=sharing>
